# Supplementary material
Source: publisher site journal article supplement (https://www.dovepress.com/article/supplementary_file/521070/521070_Supplementary%20Table1_4.docx)
Supplement: Supplementary file 1 [file 521070_Supplementary%20Table1_4.docx]

**Supplementary Table1:** Detailed Information on Hemofilters Used in CVVH

| Hemofilter Model | Manufacturer | Membrane Material | Surface Area (m2) |
| --- | --- | --- | --- |
| Prismaflex M150 | Baxter International Inc. | Polyflux® polysulfone-based synthetic membrane | 1.5 |
| 19U | Nipro Corporation | Cellulose Triacetate | 1.9 |
| OXiris Set | Baxter International Inc. | AN69 membrane coated with polyethylenimine and heparin | 1.5 |
| ST100 | Baxter International Inc. | AN69 membrane with a polyethylenimine coating | 1.0 |
| Acute Series | B. Braun SE | Polysulfone membrane | 1.0 - 2.0 |

**Abbreviations:** CVVH, Continuous Veno-Venous Hemofiltration.
